# Supplementary material
Source: Springer Nature journal article supplement (https://www.springermedizin.de/resource/supplementary/12974_2010_258_MOESM8_ESM.pdf/9601104)

**A**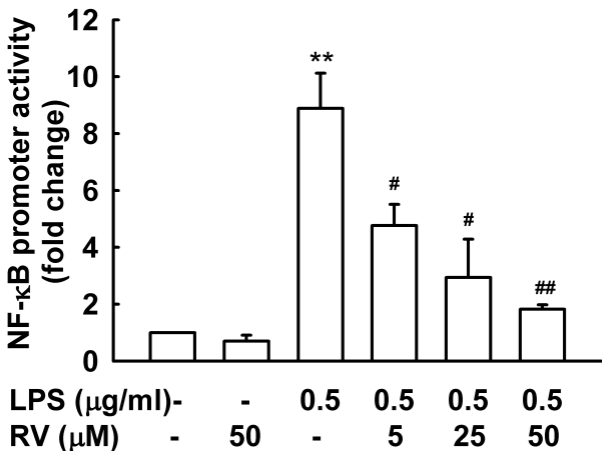**B**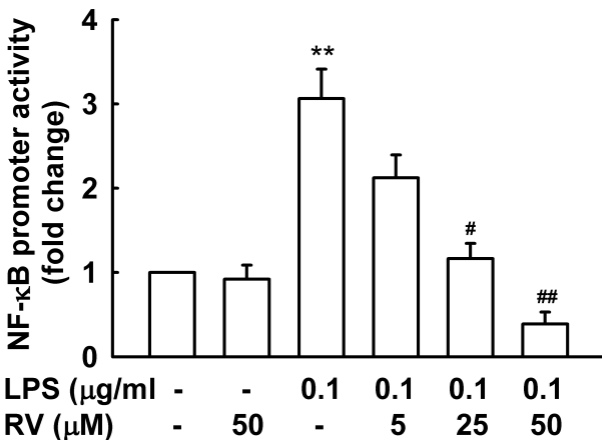

Supplement: MOESM8 [file 9601104]
